# Supplementary material
Source: PubMed Central journal article supplement (PMC1863451)

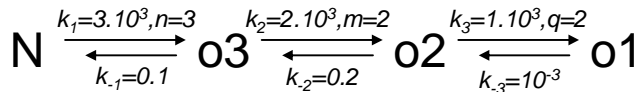

$$\left\{ \begin{array}{l} \frac{dN}{dt} = -nk_1 N^n + k_{-1} o_3 \\ \frac{do_3}{dt} = nk_1 N^n + k_{-2} o_2 - (k_{-1} o_3 + mk_2 o_3^m) \\ \frac{do_2}{dt} = mk_2 o_3^m + k_{-3} o_1 - (k_{-2} o_2 + qk_3 o_2^q) \\ \frac{do_1}{dt} = qk_3 o_2^q - k_{-3} o_1 \end{array} \right.$$

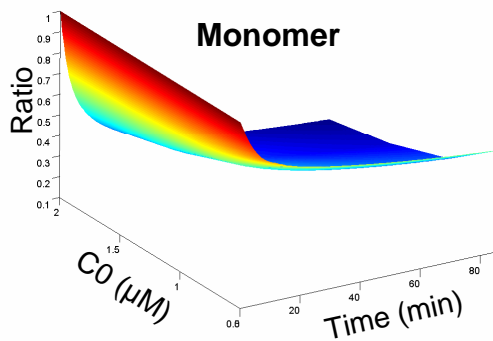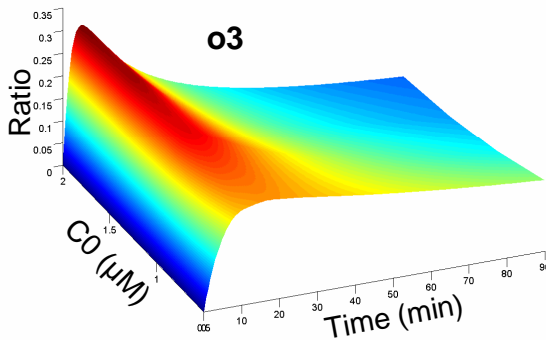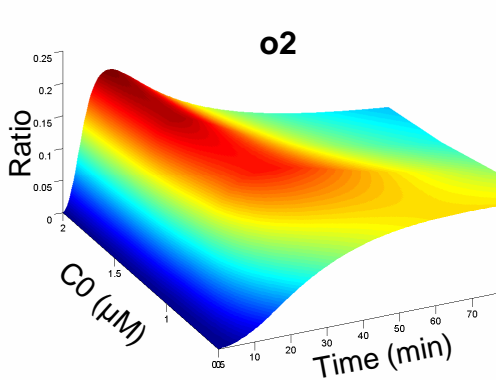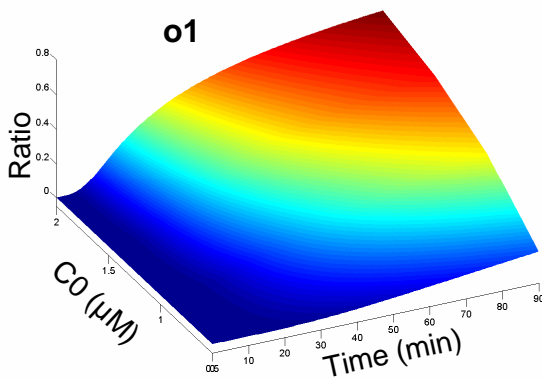

Supplement: pnas_0607745104_1.pdf [file pnas_0607745104_1.pdf]
