# Supplementary material
Source: PubMed Central journal article supplement (PMC1863451)

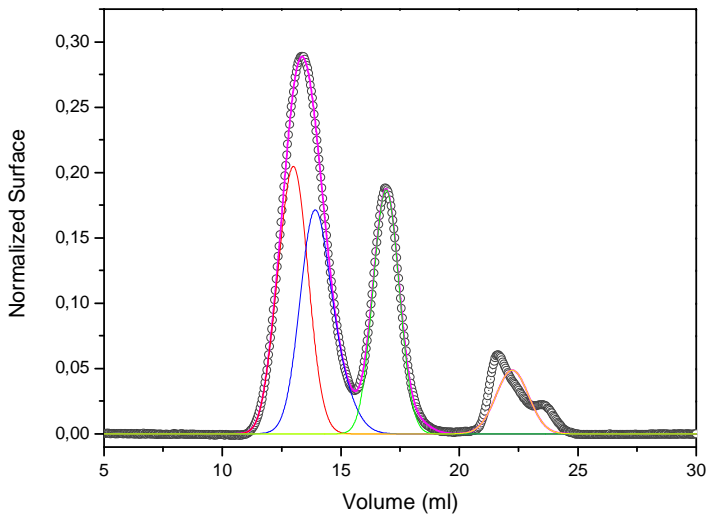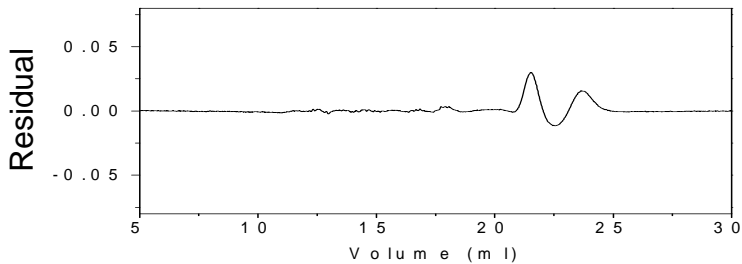

Supplement: pnas_0607745104_2.pdf [file pnas_0607745104_2.pdf]
